# Supplementary material
Source: PubMed Central journal article supplement (PMC6537834)
Supplement: jamasurg-154-746-s001.pdf [file jamasurg-154-746-s001.pdf]

## Supplementary Online Content

Yu EW, Kim SC, Sturgeon DJ, Lindeman KG, Weissman JS. Fracture risk after Roux-en-Y gastric bypass vs adjustable gastric banding among Medicare beneficiaries. *JAMA Surg*. Published online May 15, 2019. doi:10.1001/jamasurg.2019.1157

**eTable 1.** Definition of Fracture Outcomes

**eTable 2.** Baseline Characteristics in 365-Days Before RYGB or AGB Surgery Within Propensity Score (PS)–Matched Cohort

**eTable 3.** Incidence Rates (IRs) and Hazard Ratios (HRs) for Fracture in PS-Matched Cohort

**eFigure 1.** Hazard Ratios for Nonvertebral Fracture After RYGB and AGB Stratified by Age, Sex, Diabetes Status, and Race

**eFigure 2.** Time to Nonvertebral Fracture After RYGB and AGB Within PS-Matched Cohort.

This supplementary material has been provided by the authors to give readers additional information about their work.

**eTable 1. Definition of Fracture Outcomes**

| <b>Fracture</b> | <b>Definition</b>                                                                                                                                                                                                                                                                                                                                                                    |
|-----------------|--------------------------------------------------------------------------------------------------------------------------------------------------------------------------------------------------------------------------------------------------------------------------------------------------------------------------------------------------------------------------------------|
| Humerus         | Humerus fracture diagnosis (ICD-9: 812.xx, 733.11) AND procedure within 30 days of fracture date (ICD-9: 78.52, 79.01, 79.11, 79.21, 79.31, 79.61; CPT-4: 23600, 23605, 23610, 23615, 23620, 23625, 23630, 23665, 23670, 23680, 24500, 24505, 24506, 24510, 24515, 24530, 24531, 24535, 24536, 24538, 24540, 24542, 24545, 24560, 24565, 24570, 24575, 24581, 24583, 24585-8, 24516) |
| Wrist           | Radius/ulna fracture diagnosis (ICD-9: 813.xx, 733.12) AND procedure within 30 days of fracture date (ICD-9: 78.53, 79.02, 79.12, 79.22, 79.32, 79.62; CPT-4: 24620, 24625, 24635, 24650, 24655, 24660, 24665-6, 24670, 24680, 24685, 25500, 25505, 25510, 25515, 25530, 25535, 25540, 25545, 25560, 25565, 25570, 25575, 25600, 25605, 25610-1, 25615, 25620, 25650)                |
| Hip             | Hip fracture diagnosis (ICD-9 code: 820.xx,733.14,733.96) during hospitalization AND procedure code during hospitalization (ICD-9: 78.55, 79.05, 79.15, 79.25, 79.35, 79.65; CPT-4: 27230, 27232, 27235-6, 27238, 27240, 27244-6, 27248, 27267, 27268, 27269, 27125, 27130)                                                                                                          |
| Pelvis          | Pelvis fracture diagnosis (ICD-9: 808.xx, 733.98), CPT codes (27193, 27194, 27200, 27202, 27215, 27216, 27217, 27218, 27220, 27222, 27226, 27227, 27228)                                                                                                                                                                                                                             |

**eTable 2.** Baseline Characteristics in 365-Days Before RYGB or AGB Surgery Within Propensity Score (PS)–Matched Cohort

|                                              |              | <b>RYGB<br/>N=12,183</b>                | <b>AGB<br/>N=12,183</b>                 | <b>RYGB vs. AGB</b>                            |
|----------------------------------------------|--------------|-----------------------------------------|-----------------------------------------|------------------------------------------------|
|                                              |              | <b>Percent (%)<br/>or mean ±<br/>SD</b> | <b>Percent (%)<br/>or mean ±<br/>SD</b> | <b>Standardized<br/>difference of<br/>mean</b> |
| <b>Demographic</b>                           |              |                                         |                                         |                                                |
| Age, years                                   |              | 54 ± 12                                 | 54 ± 12                                 | -0.009                                         |
| Female, %                                    |              | 78%                                     | 78%                                     | -0.002                                         |
| Geographic<br>region                         | Midwest, %   | 24.4                                    | 24.2                                    | 0.016                                          |
|                                              | Northeast, % | 17.3                                    | 17.4                                    |                                                |
|                                              | South, %     | 41.7                                    | 41.4                                    |                                                |
|                                              | West, %      | 16.5                                    | 16.9                                    |                                                |
| <b>Comorbidities</b>                         |              |                                         |                                         |                                                |
| Combined comorbidity score**                 |              | 0.9 ± 1.6                               | 1.0 ± 1.7                               | 0.010                                          |
| HTN, %                                       |              | 62.8                                    | 63.2                                    | -0.008                                         |
| Hyperlipidemia, %                            |              | 49.9                                    | 49.7                                    | 0.005                                          |
| Diabetes, %                                  |              | 21.8                                    | 21.9                                    | -0.003                                         |
| COPD, %                                      |              | 29.5                                    | 29.3                                    | 0.003                                          |
| Smoking, %                                   |              | 13.4                                    | 13.2                                    | 0.006                                          |
| CHD, %                                       |              | 24.4                                    | 24.7                                    | -0.007                                         |
| Fatty liver, %                               |              | 8.9                                     | 6.9                                     | 0.071                                          |
| Chronic liver disease, %                     |              | 9.3                                     | 7.5                                     | 0.067                                          |
| Osteoporosis, %                              |              | 3.0                                     | 3.0                                     | -0.002                                         |
| <b>Medications</b>                           |              |                                         |                                         |                                                |
| Antihypertensives, %                         |              | 41.8                                    | 41.6                                    | 0.005                                          |
| NSAIDs, %                                    |              | 34.5                                    | 34.5                                    | 0.001                                          |
| SSRIs, %                                     |              | 30.5                                    | 30.7                                    | -0.003                                         |
| PPIs, %                                      |              | 27.7                                    | 28.0                                    | -0.006                                         |
| Benzodiazepines + other sleeping pills,<br>% |              | 14.6                                    | 14.4                                    | 0.004                                          |
| Statins, %                                   |              | 33.0                                    | 32.9                                    | 0.003                                          |
| Oral glucocorticoids, %                      |              | 24.0                                    | 24.2                                    | -0.005                                         |
| Beta blockers, %                             |              | 20.0                                    | 20.1                                    | -0.003                                         |
| Thyroid meds, %                              |              | 14.9                                    | 15.5                                    | -0.016                                         |
| TZDs, %                                      |              | 39.1                                    | 39.1                                    | 0.0003                                         |
| Insulin, %                                   |              | 12.6                                    | 13.1                                    | -0.015                                         |
| Osteoporosis meds, %                         |              | 2.0                                     | 2.2                                     | -0.015                                         |
| <b>Health care utilization</b>               |              |                                         |                                         |                                                |
| Number of doctor visits, N                   |              | 5.0 ± 7.3                               | 5.0 ± 7.4                               | 0.002                                          |
| Number of hospitalizations, N                |              | 0.16 ± 0.53                             | 0.16 ± 0.52                             | -0.004                                         |
| Number of ER visits, N                       |              | 0.72 ± 1.8                              | 0.72 ± 2.5                              | -0.004                                         |
| BMD ordered, %                               |              | 5.5                                     | 5.3                                     | 0.008                                          |

HTN = Hypertension; COPD = Chronic Obstructive Pulmonary Disease; CHD = Chronic Heart Disease; NSAIDs = Nonsteroidal Anti-Inflammatory Drugs; SSRIs = Selective Serotonin Reuptake Inhibitors; PPIs = Proton Pump Inhibitors; TZDs = thiazolidinediones; BMD = Bone Mineral Density

**eTable 3.** Incidence Rates (IRs) and Hazard Ratios (HRs) for Fracture in PS-Matched Cohort

| Outcome          | Group | No. of Events | Person-years | IR/1000 Person Years (95% CI) | HR (95% CI)      |
|------------------|-------|---------------|--------------|-------------------------------|------------------|
| Any Fracture     | RYGB  | 256           | 33,817       | 7.6 (6.6-8.5)                 | 1.68 (1.38-2.05) |
|                  | AGB   | 157           | 34,850       | 4.5 (3.8-5.2)                 | Ref.             |
| Wrist Fracture   | RYGB  | 148           | 33,817       | 4.4 (3.7-5.1)                 | 1.66 (1.28-2.16) |
|                  | AGB   | 92            | 34,850       | 2.6 (2.1-3.2)                 | Ref.             |
| Hip Fracture     | RYGB  | 56            | 33,817       | 1.7 (1.2-2.1)                 | 2.51 (1.57-4.16) |
|                  | AGB   | 23            | 34,850       | 0.7 (0.4-0.9)                 | Ref.             |
| Humerus Fracture | RYGB  | 12            | 33,817       | 0.5 (0.3-0.8)                 | 1.54 (0.75-3.29) |
|                  | AGB   | 18            | 34,850       | 0.3 (0.1-0.5)                 | Ref.             |
| Pelvis Fracture  | RYGB  | 57            | 33,817       | 2.3 (1.8-2.9)                 | 1.39 (0.96-2.03) |
|                  | AGB   | 79            | 34,850       | 1.6 (1.2-2.1)                 | Ref.             |

**eFigure 1.** Hazard Ratios for Nonvertebral Fracture After RYGB and AGB Stratified by Age, Sex, Diabetes Status, and Race

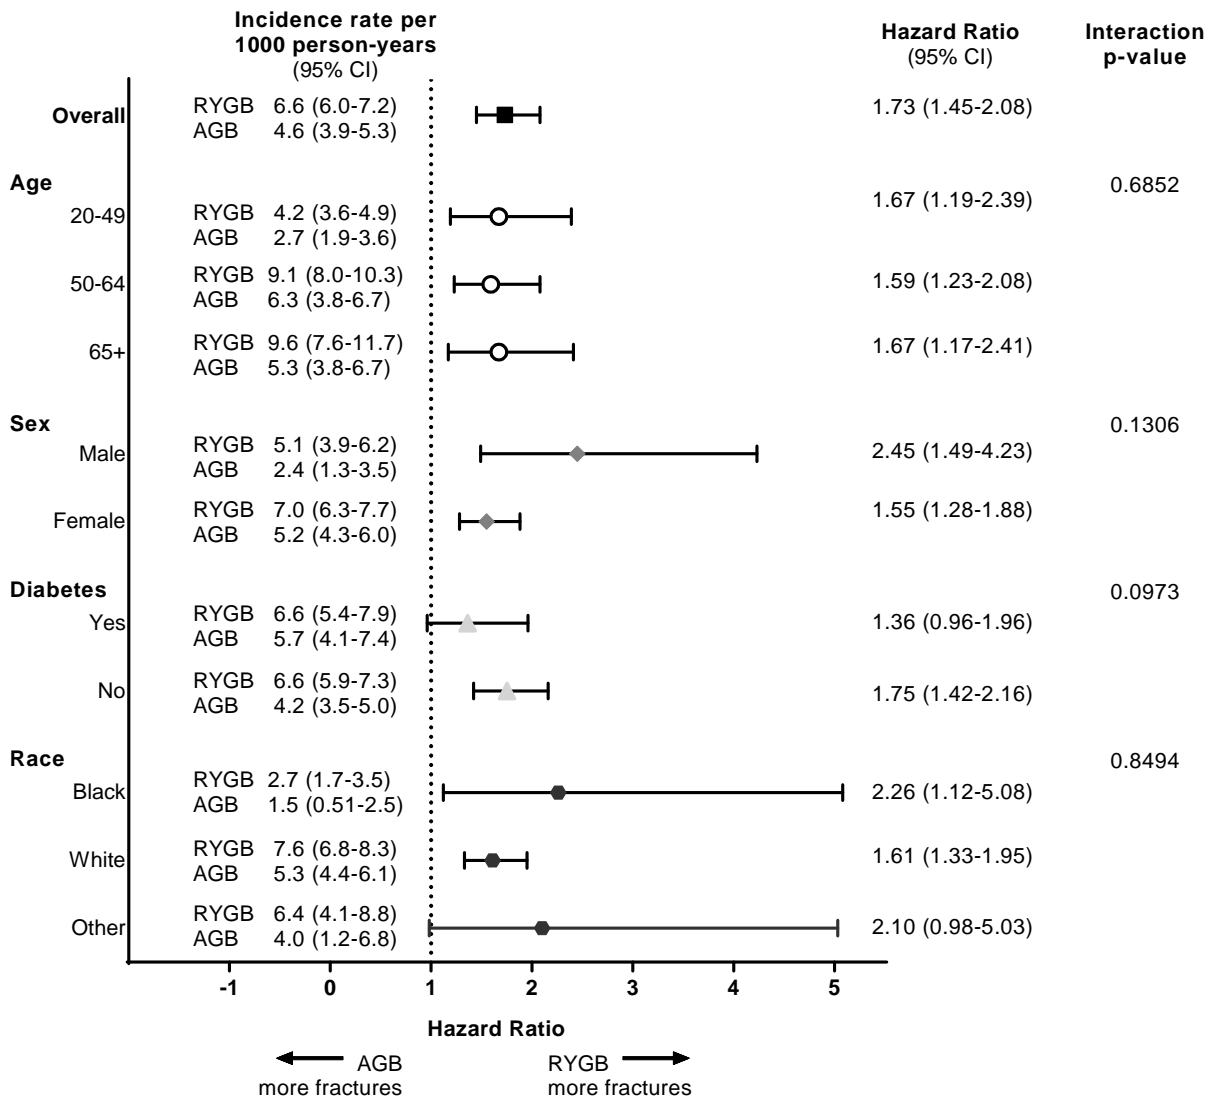

**eFigure 2.** Time to Nonvertebral Fracture After RYGB and AGB Within PS-Matched Cohort.

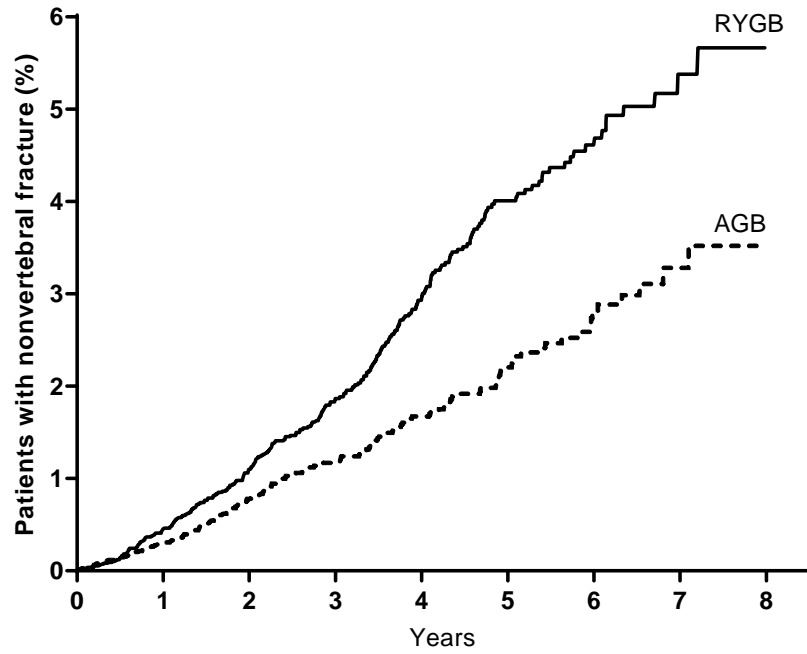

|                      |      |       |      |      |      |      |      |      |     |
|----------------------|------|-------|------|------|------|------|------|------|-----|
| Number at risk:      | RYGB | 12183 | 9076 | 7335 | 5563 | 3952 | 2501 | 1288 | 925 |
|                      | AGB  | 12183 | 9426 | 7614 | 5696 | 4052 | 2521 | 1296 | 439 |
| Number of fractures: | RYGB | --    | 45   | 53   | 50   | 51   | 37   | 12   | 8   |
|                      | AGB  | --    | 31   | 41   | 27   | 25   | 17   | 11   | 5   |
